# Supplementary material for: General Anaesthesia Shifts the Murine Circadian Clock in a Time-Dependant Fashion
Source: PubMed Central journal article supplement (PMC7930986; doi:10.3390/clockssleep3010006), 2021-01-26

Supplementary Materials:

Figure S1: Behavioural actograms of 80 C57BL6/VJU mice exposed to control (10 min) GA, or treatment (6 hour) GA with isoflurane. Yellow blocks indicate timing of the light portion of the LD 12:12 cycle and red bars indicate the GA.

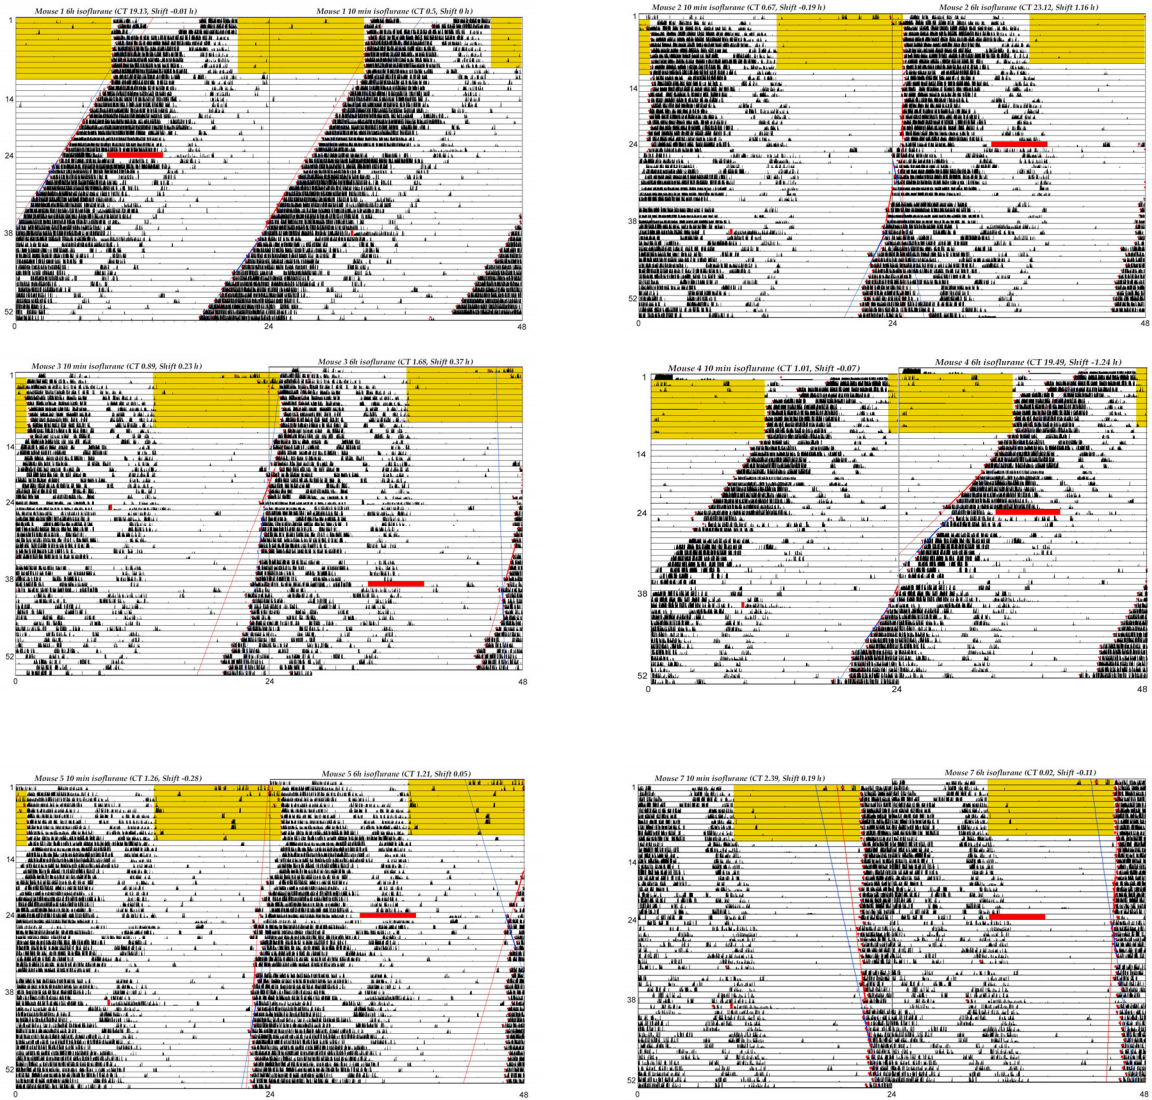

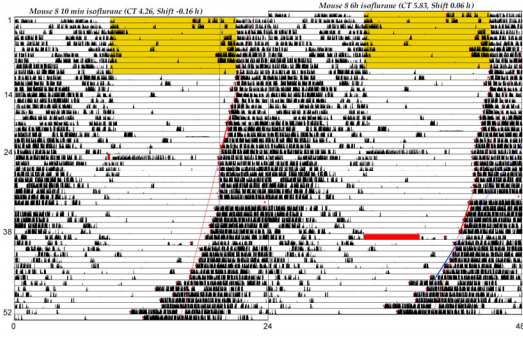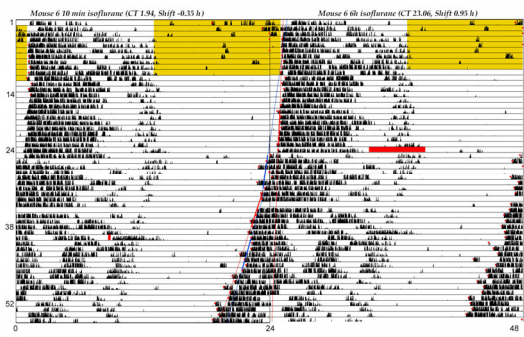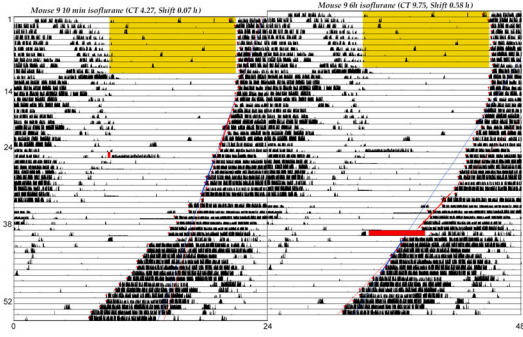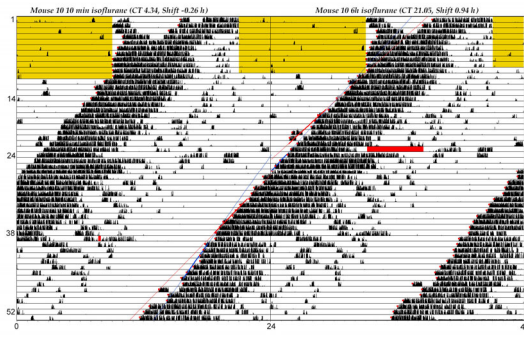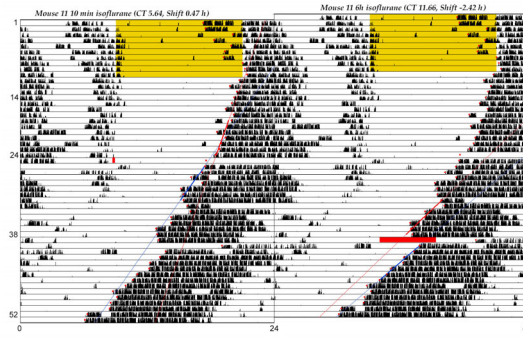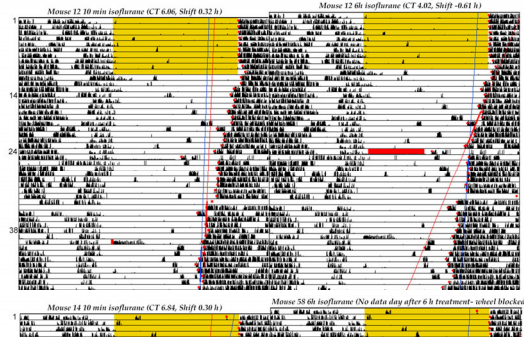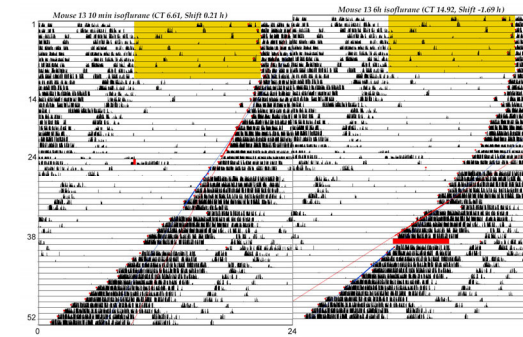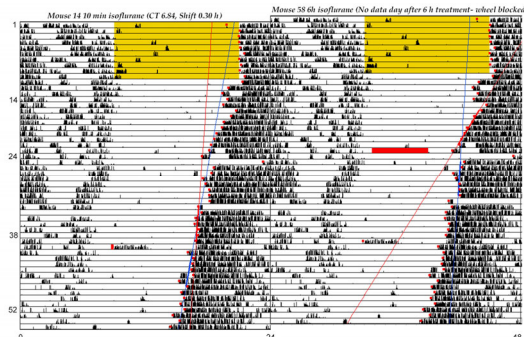

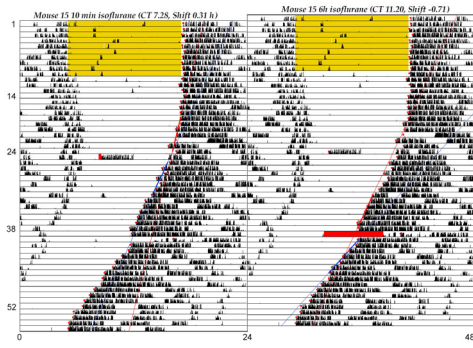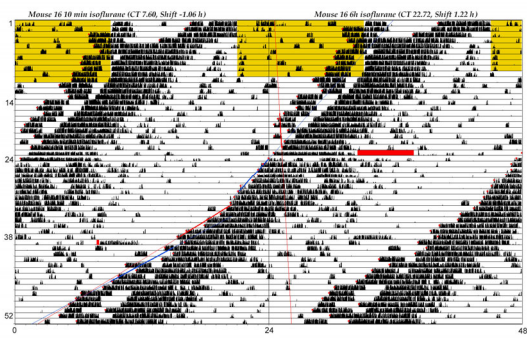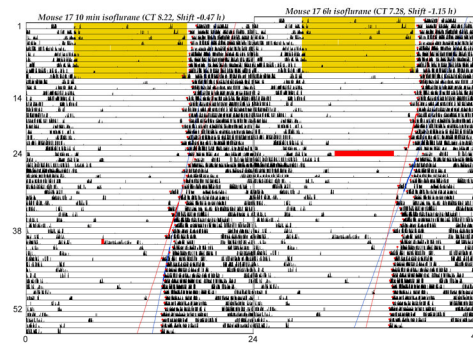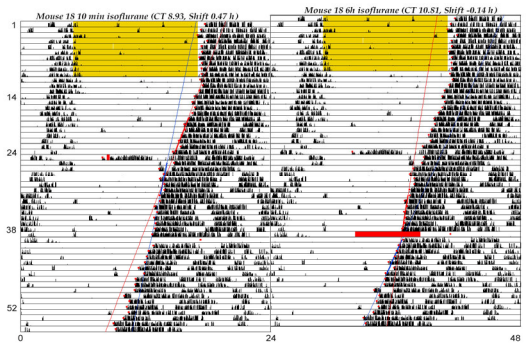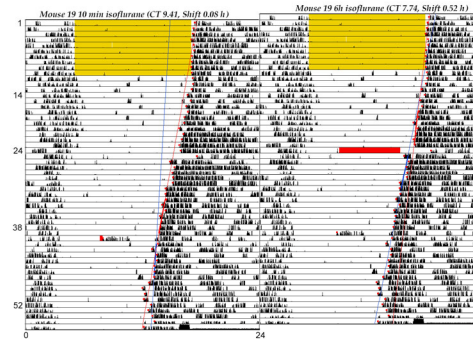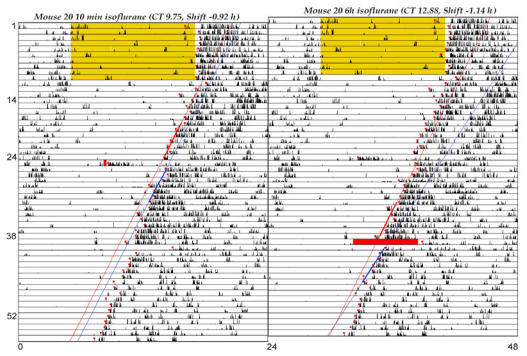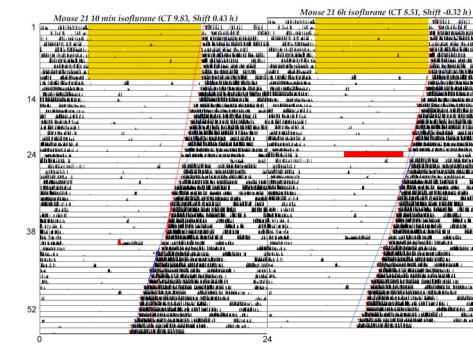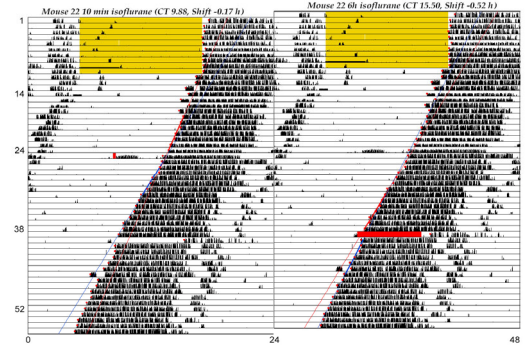

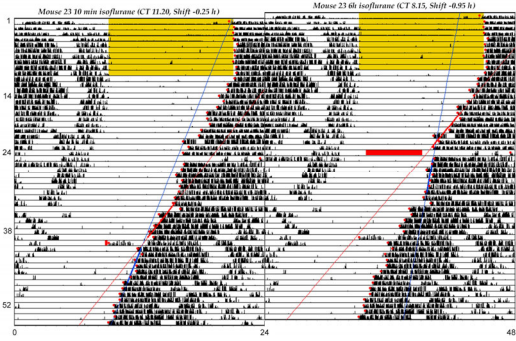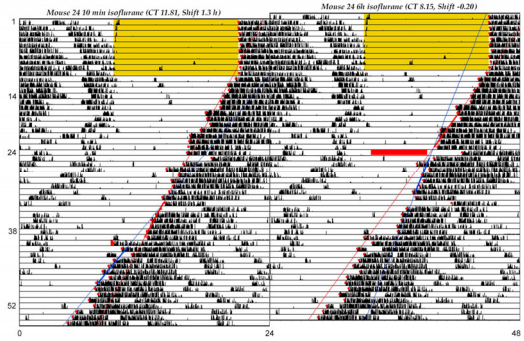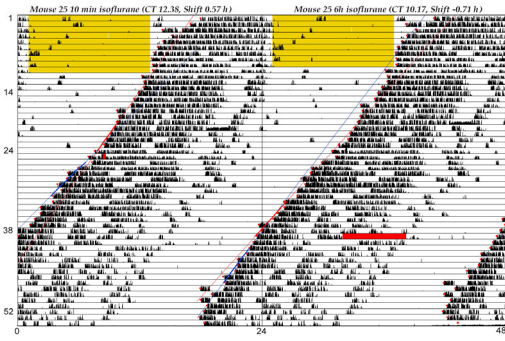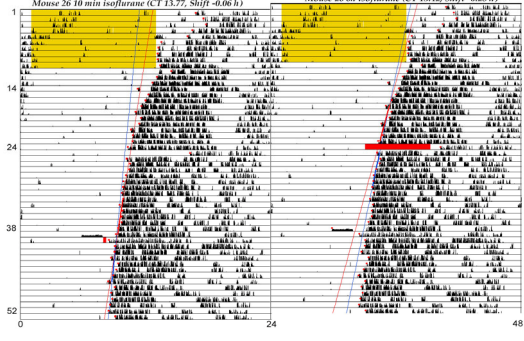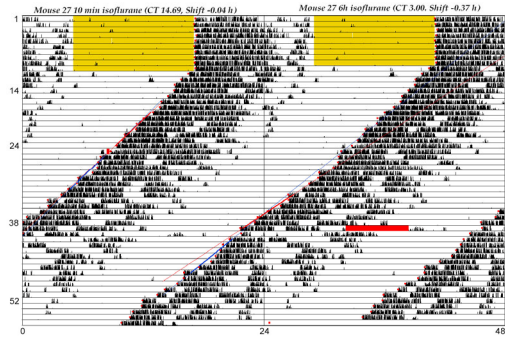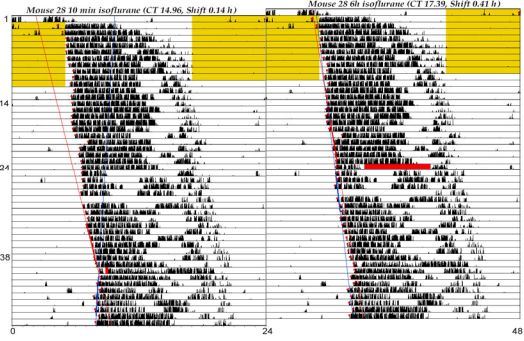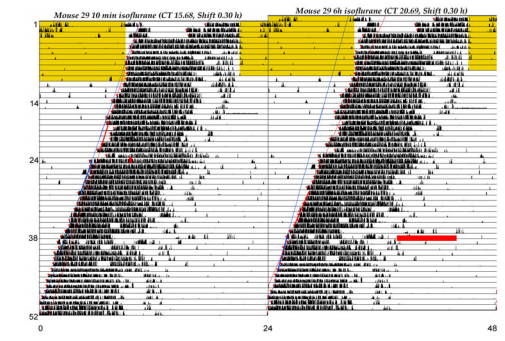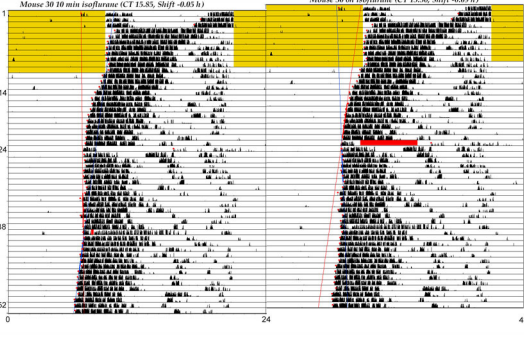

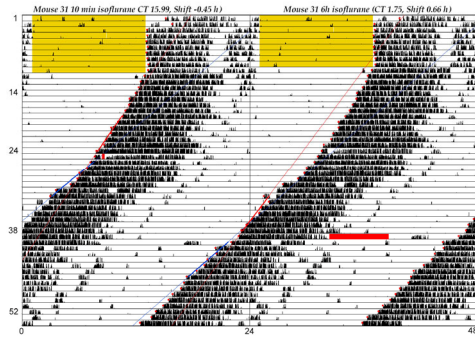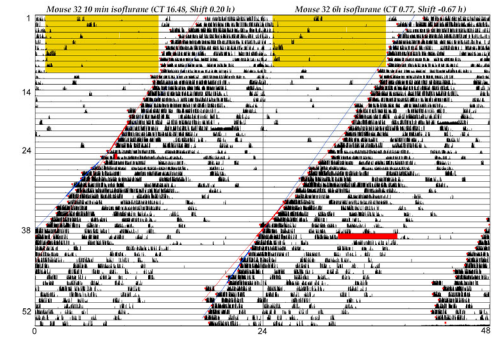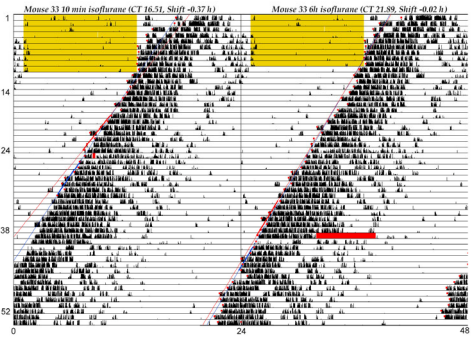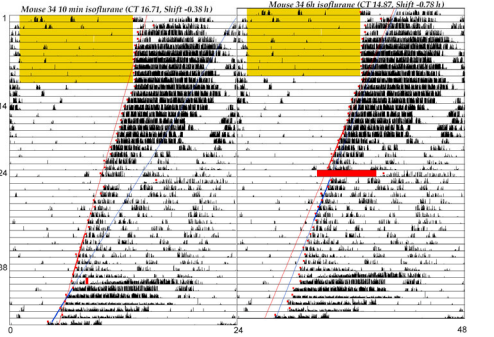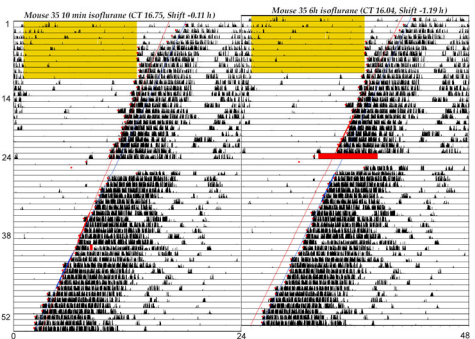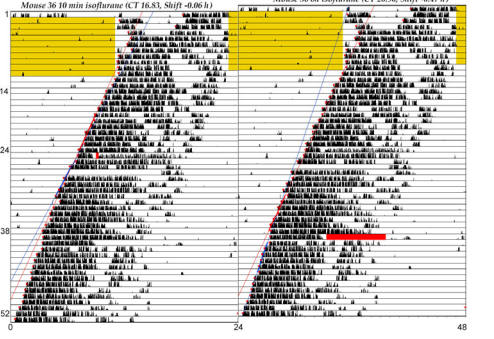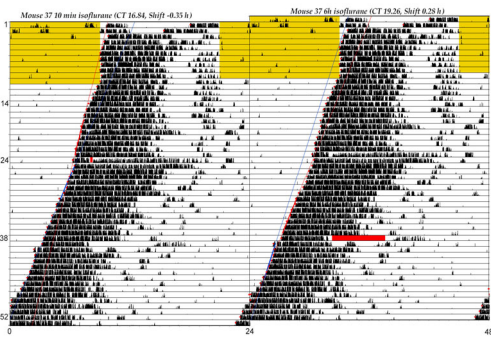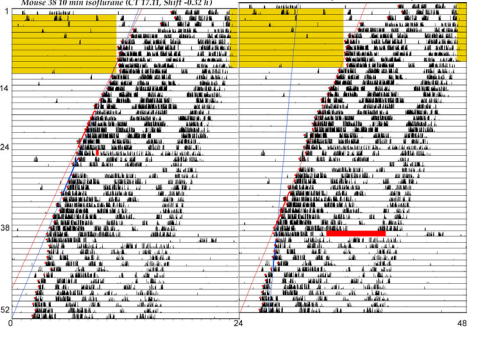

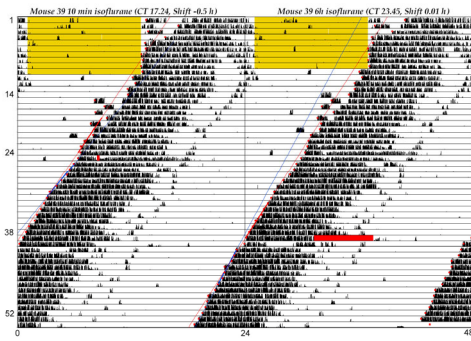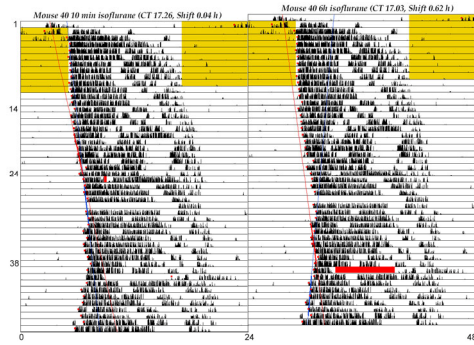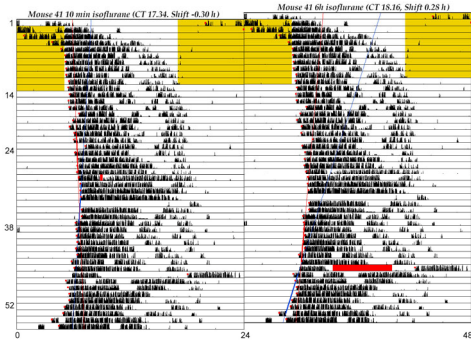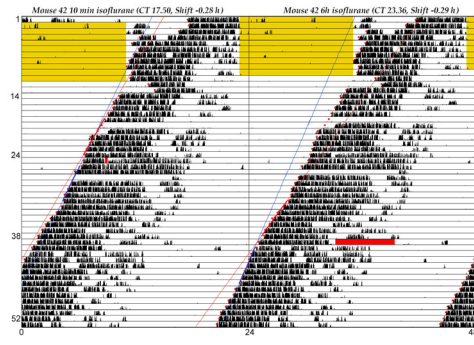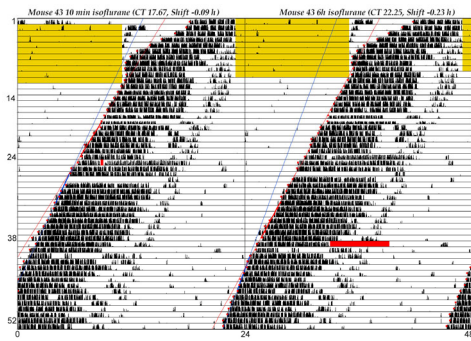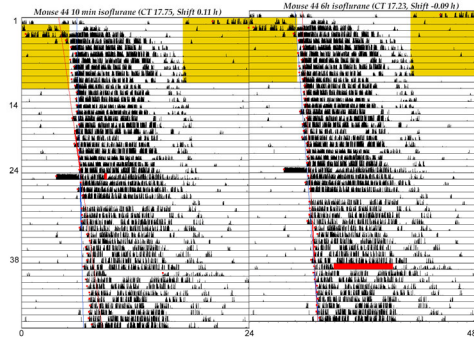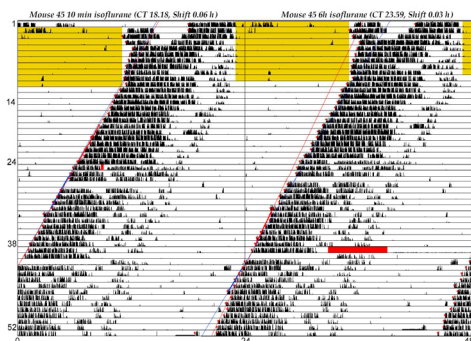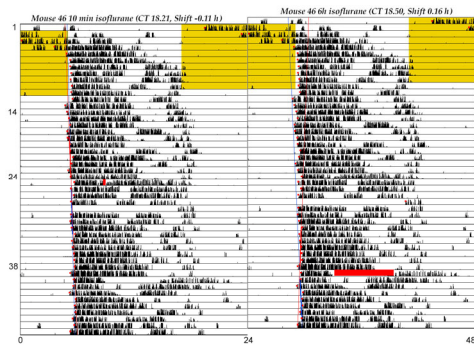

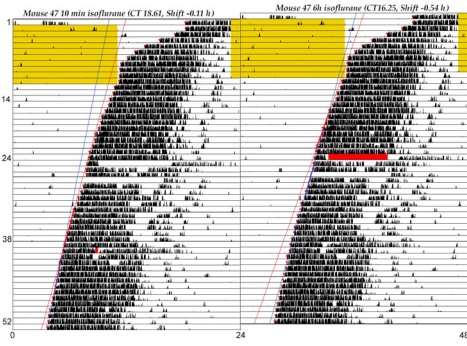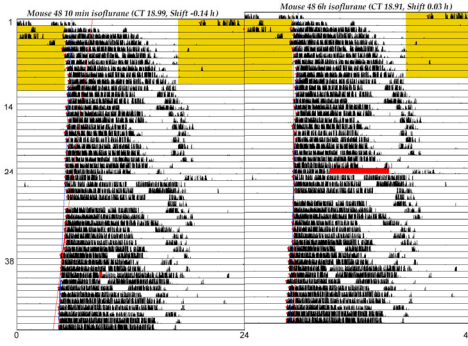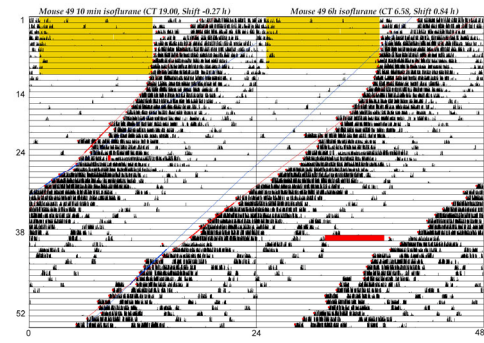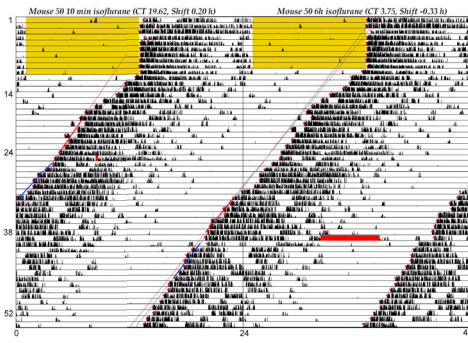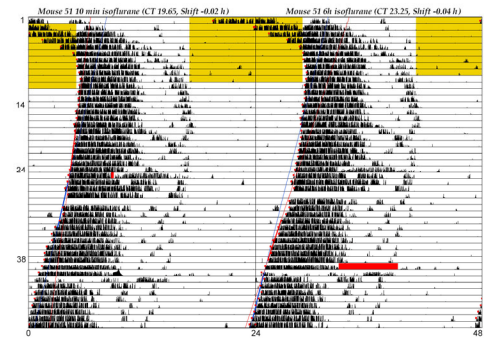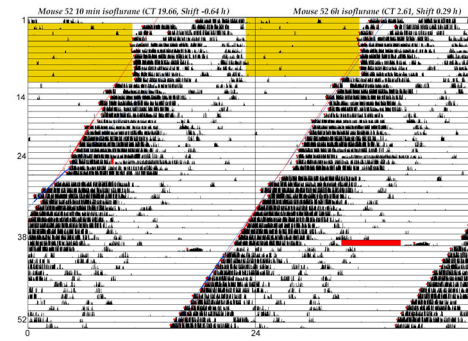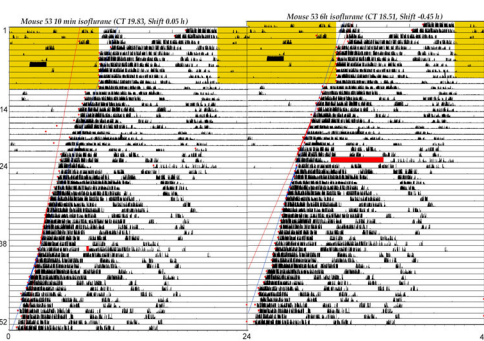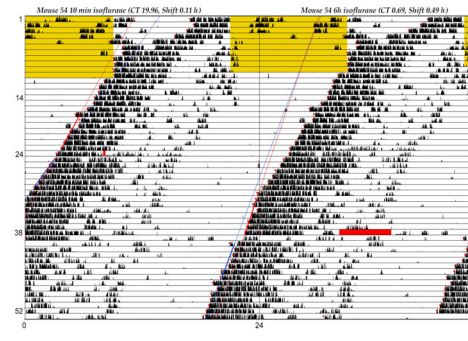

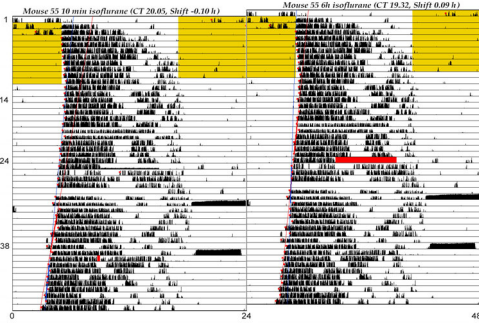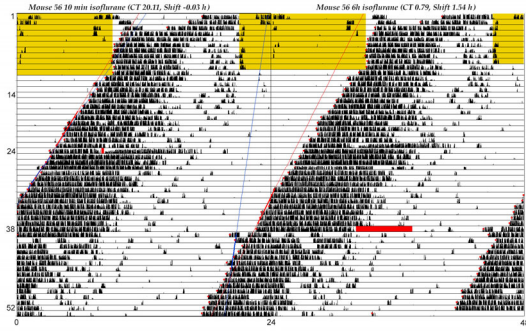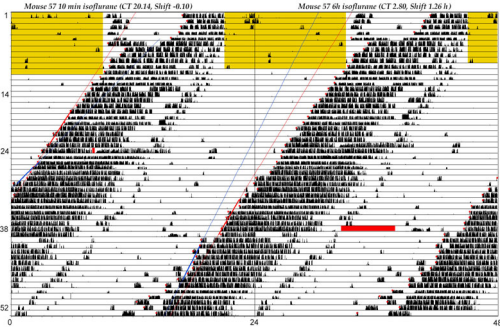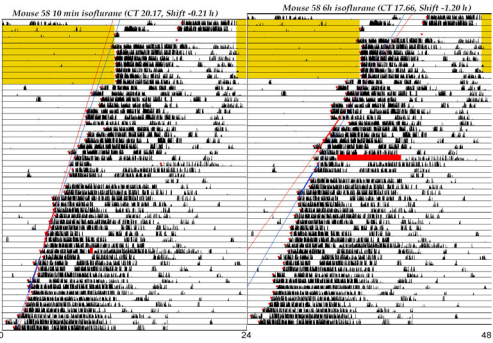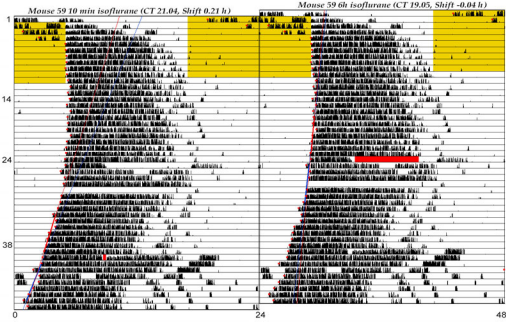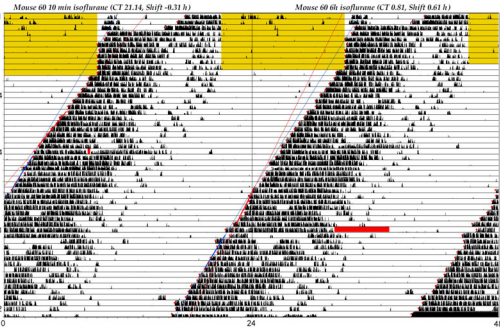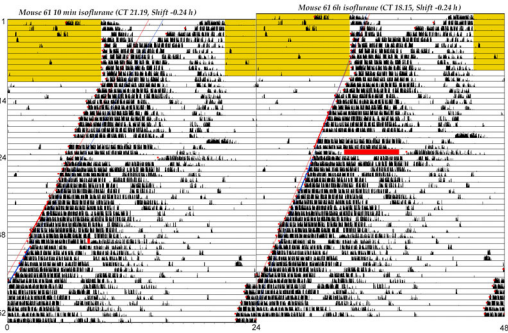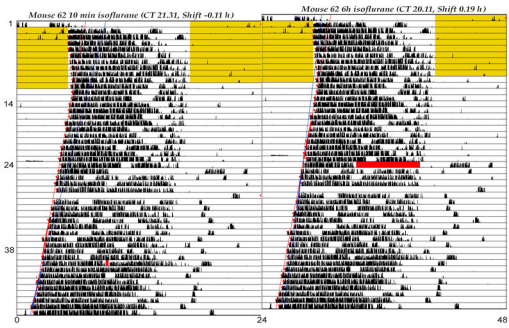



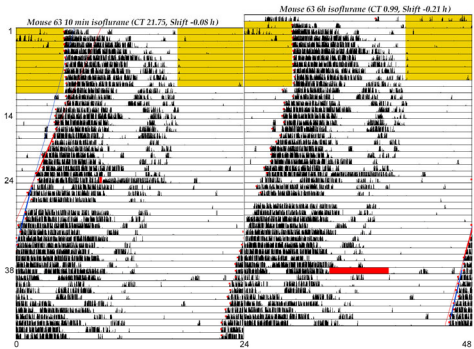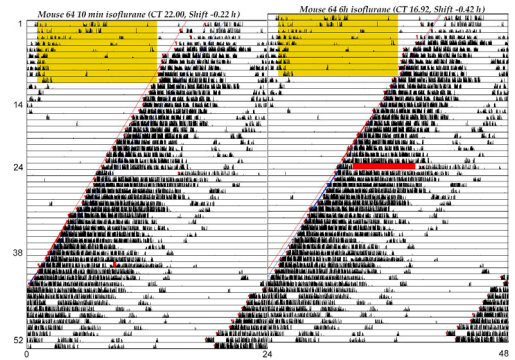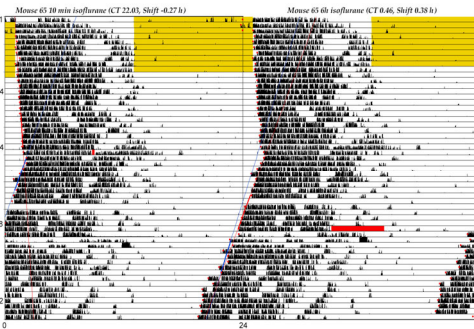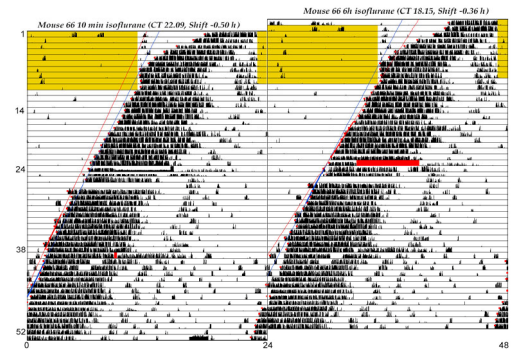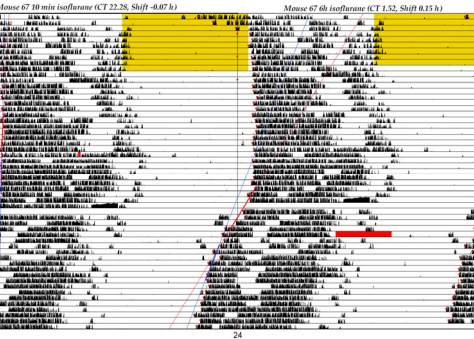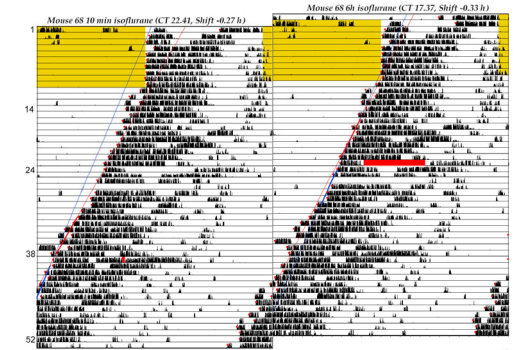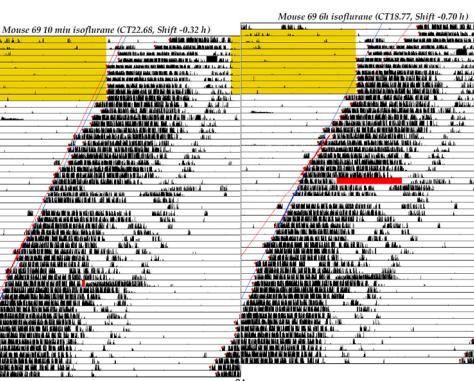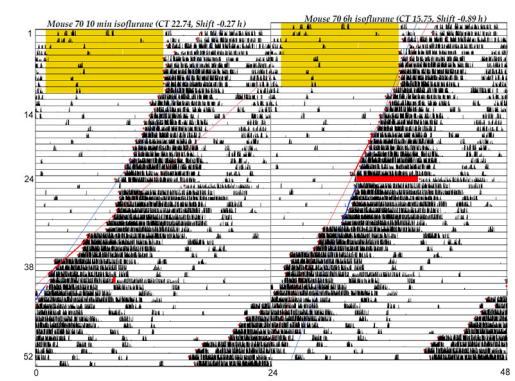

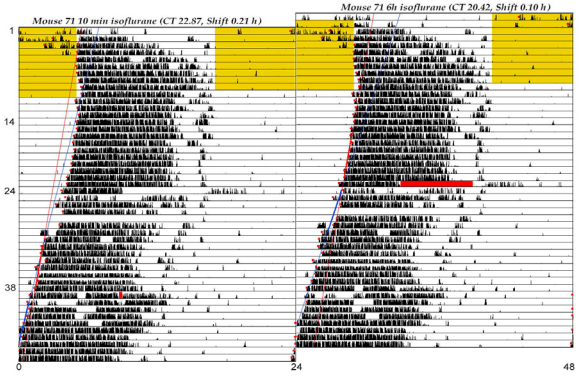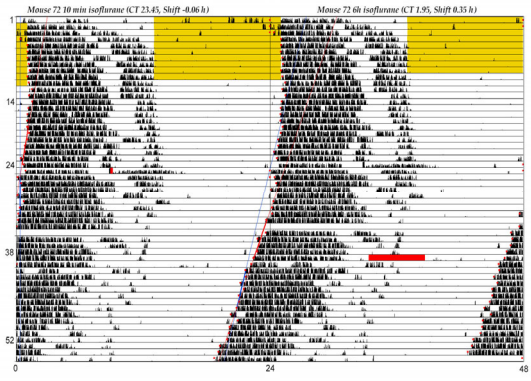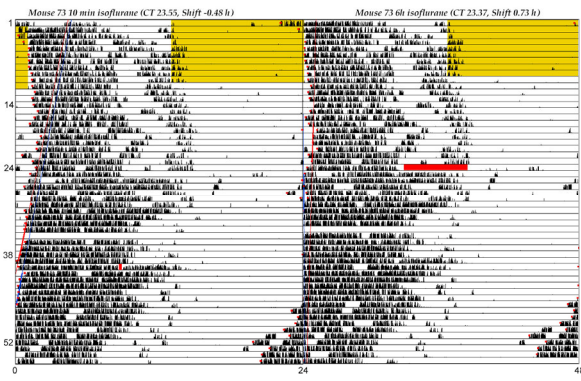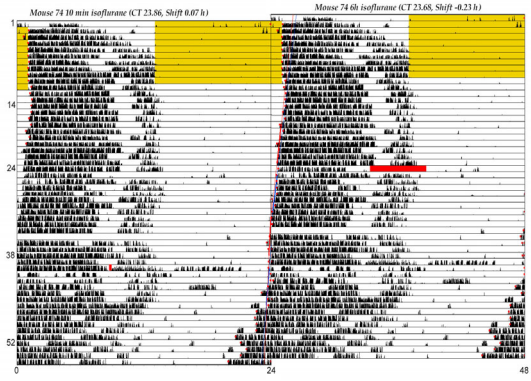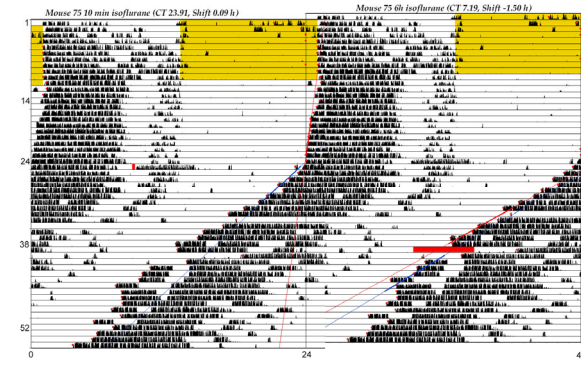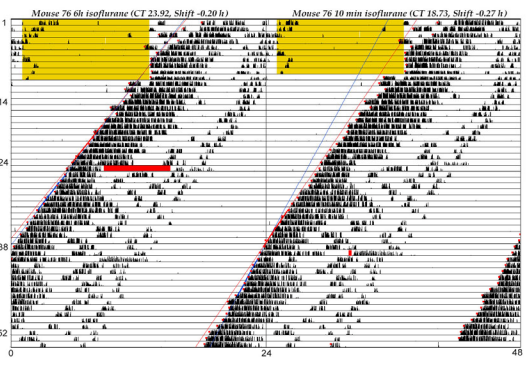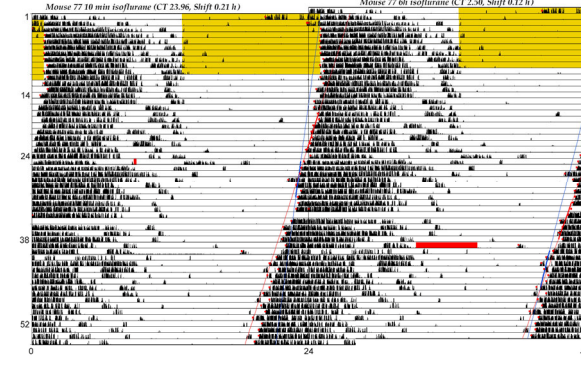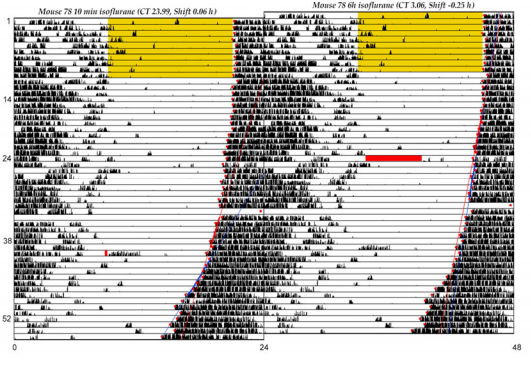

Mouse 79 10 min isofurane (No shift calculated)

Mouse 79 6h isofurane (CT 7.09, Shift 1.1 h)

Mouse 80 10 min isofurane (No phase shift calculated)

Mouse 80 6h isofurane (CT 13.71, Shift -0.74 h)

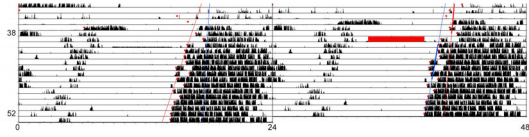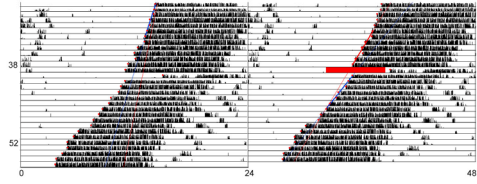

Supplement: clockssleep-03-00006-s001.pdf [file clockssleep-03-00006-s001.pdf]
